# Supplementary material for: Fall Prediction Based on Instrumented Measures of Gait and Turning in Daily Life in People with Multiple Sclerosis
Source: MDPI journal article supplement (doi:10.3390/s22165940), 2022-08-09
Supplement: s1 [file s1]

**Table S1.** Mobility measures and their definitions grouped by domains of mobility. Each domain is color-coded.

| Mobility Measures                            | Definition                                                                                                                                                                                                          |
|----------------------------------------------|---------------------------------------------------------------------------------------------------------------------------------------------------------------------------------------------------------------------|
| <b>QUALITY</b>                               |                                                                                                                                                                                                                     |
| <b>Lower Body</b>                            |                                                                                                                                                                                                                     |
| Gait Speed (m/s)                             | The forward speed of the subject, measured as the forward distance traveled during the gait cycle divided by the stride duration.                                                                                   |
| Stride Length (m)                            | The forward distance traveled by the foot during a step.                                                                                                                                                            |
| Cadence (strides/min)                        | The number of strides per minute.                                                                                                                                                                                   |
| Stride Duration (s)                          | The duration from the time of initial contact to the time of the next initial contact of the same foot.                                                                                                             |
| Double-Support (%)                           | The portion of the stride duration in which both feet are in contact with the ground, calculated as the sum of initial and terminal double-support as a percentage of the stride duration.                          |
| Swing (%)                                    | The portion of the stride duration in which the foot is not in contact with the ground, calculated as the period from the time of toe-off until the time of initial contact as a percentage of the stride duration. |
| Elevation at Mid-Swing (cm)                  | The height of the foot sensor at the moment of maximum forward velocity of the foot, relative to the sensor height during stance.                                                                                   |
| Pitch at Toe-Off (°)                         | The angle of the foot relative to a level, horizontal surface at the time the foot leaves the ground.                                                                                                               |
| Pitch at Initial Contact (°)                 | The angle of the foot relative to a level, horizontal surface at the time the foot begins contact with the ground.                                                                                                  |
| <b>Upper Body</b>                            |                                                                                                                                                                                                                     |
| Transverse Range of Motion (rad)             | The angular range torso movement at the lumbar level in the transverse plane.                                                                                                                                       |
| Sagittal Range of Motion (rad)               | The angular range of torso movement at the lumbar level in the sagittal plane.                                                                                                                                      |
| Coronal Range of Motion (rad)                | The angular range of torso movement at the lumbar level in the coronal plane.                                                                                                                                       |
| <b>Turning</b>                               |                                                                                                                                                                                                                     |
| Turn Duration (s)                            | The time from the start of the turn until the end of the turn.                                                                                                                                                      |
| Turn Rate Average (°/s)                      | Average of the heading angle velocity of the lumbar torso during the turn period.                                                                                                                                   |
| Turn Angle (°)                               | Total change in the heading angle of the turn calculated as the difference between the ending and starting heading angle.                                                                                           |
| Steps in Turn (#)                            | Total number of steps detected during the turn.                                                                                                                                                                     |
| <b>Variability</b>                           |                                                                                                                                                                                                                     |
| All Mobility Measures Except Activity Domain | The coefficient of variation (CV) (standard deviation divided by the mean) across all the strides during a week of recording.                                                                                       |
| <b>QUANTITY</b>                              |                                                                                                                                                                                                                     |
| <b>Activity</b>                              |                                                                                                                                                                                                                     |
| Strides per Hour (#)                         | The total number of stride pairs detected and validated during normal forward walking gait across all recordings divided by the total duration of all the recordings.                                               |
| Turns per Hour (#)                           | The total number of detected turns across all recordings divided by the total duration of all the recordings.                                                                                                       |
| Bouts per Hour (#)                           | The total number of bouts detected and validated during normal forward walking gait across all recordings divided by the total duration of all the recordings.                                                      |

**Table S2.** Instrumented gait and turning measures collected during the daily home monitoring that were not significantly different between fallers and non-fallers.

|                                          | <b>Faller/Non-Faller</b> | <b>N</b> | <b>Mean</b> | <b>SE</b> | <b>p</b> |
|------------------------------------------|--------------------------|----------|-------------|-----------|----------|
| <b>CV for Gait Speed</b>                 | Non-Fallers              | 13       | 0.24        | 0.01      | 0.74     |
|                                          | Fallers                  | 13       | 0.24        | 0.02      |          |
| <b>CV for Stride Length</b>              | Non-Fallers              | 13       | 0.17        | 0.01      | 0.62     |
|                                          | Fallers                  | 13       | 0.18        | 0.01      |          |
| <b>CV for Cadence</b>                    | Non-Fallers              | 13       | 0.12        | 0.01      | 0.72     |
|                                          | Fallers                  | 13       | 0.12        | 0.01      |          |
| <b>CV for Stride Duration</b>            | Non-Fallers              | 13       | 0.15        | 0.01      | 0.96     |
|                                          | Fallers                  | 13       | 0.14        | 0.01      |          |
| <b>CV for Double Support</b>             | Non-Fallers              | 13       | 0.19        | 0.02      | 0.53     |
|                                          | Fallers                  | 13       | 0.20        | 0.02      |          |
| <b>CV for Swing</b>                      | Non-Fallers              | 13       | 0.06        | 0.01      | 0.07     |
|                                          | Fallers                  | 13       | 0.09        | 0.01      |          |
| <b>CV for Elevation at Mid Swing</b>     | Non-Fallers              | 13       | 0.73        | 0.06      | 0.31     |
|                                          | Fallers                  | 13       | 0.64        | 0.06      |          |
| <b>CV for Pitch at Toe Off</b>           | Non-Fallers              | 13       | 0.13        | 0.01      | 0.07     |
|                                          | Fallers                  | 13       | 0.17        | 0.02      |          |
| <b>CV for Pitch at Initial Contact</b>   | Non-Fallers              | 13       | 0.32        | 0.03      | 0.23     |
|                                          | Fallers                  | 13       | 0.44        | 0.09      |          |
| <b>CV for Turn Duration</b>              | Non-Fallers              | 12       | 0.36        | 0.01      | 0.60     |
|                                          | Fallers                  | 13       | 0.37        | 0.01      |          |
| <b>CV for Turn Rate Average</b>          | Non-Fallers              | 12       | 0.35        | 0.01      | 0.48     |
|                                          | Fallers                  | 13       | 0.34        | 0.01      |          |
| <b>CV for Turn Angle</b>                 | Non-Fallers              | 12       | 0.49        | 0.01      | 0.47     |
|                                          | Fallers                  | 13       | 0.48        | 0.01      |          |
| <b>CV for Steps in Turn</b>              | Non-Fallers              | 12       | 0.59        | 0.03      | 0.86     |
|                                          | Fallers                  | 13       | 0.58        | 0.02      |          |
| <b>CV for Transverse Range of Motion</b> | Non-Fallers              | 11       | 0.49        | 0.09      | 0.40     |
|                                          | Fallers                  | 13       | 0.60        | 0.09      |          |
| <b>CV for Sagittal Range of Motion</b>   | Non-Fallers              | 11       | 0.52        | 0.06      | 0.67     |
|                                          | Fallers                  | 13       | 0.56        | 0.08      |          |
| <b>CV for Coronal Range of Motion</b>    | Non-Fallers              | 11       | 0.35        | 0.05      | 0.66     |
|                                          | Fallers                  | 13       | 0.38        | 0.04      |          |
